# Supplementary material for: Functional Profiling Reveals Altered Metabolic Activity in Divers’ Oral Microbiota During Commercial Heliox Saturation Diving
Source: Front Physiol. 2021 Oct 13;12:702634. doi: 10.3389/fphys.2021.702634 (PMC8548618; doi:10.3389/fphys.2021.702634)
Supplement: Supplementary file 1 [file Table_1.XLSX]

## Sheet: Data
Days	ID (MetaCyc)	Keyword	Category	Detail	logFC	AveExpr	t	P.Value	adj.P.Val	B
2	PWY-4722	Amine and Polyamine Degradation	Amine and Polyamine Degradation	Creatinine Degradation	-0.998828	-0.888556	-2.61244	0.0110175	0.0454705	-2.76347
5	PWY-4722	Amine and Polyamine Degradation	Amine and Polyamine Degradation	Creatinine Degradation	-0.218238	-0.888556	-0.565383	0.573642	0.755004	-4.74387
28	PWY-4722	Amine and Polyamine Degradation	Amine and Polyamine Degradation	Creatinine Degradation	-0.305855	-0.888556	-0.793348	0.430287	0.665237	-5.02662
2	PWY-5154	Amino Acid Biosynthesis	Amino Acid Biosynthesis	L-arginine Biosynthesis	0.337577	10.9397	3.19484	0.00210769	0.0205289	-1.85806
5	PWY-5154	Amino Acid Biosynthesis	Amino Acid Biosynthesis	L-arginine Biosynthesis	0.327559	10.9397	3.09259	0.00285998	0.0504368	-1.82675
28	PWY-5154	Amino Acid Biosynthesis	Amino Acid Biosynthesis	L-arginine Biosynthesis	0.0720244	10.9397	0.651794	0.516693	0.72793	-5.90464
2	TYRFUMCAT-PWY	Amino Acid Degradation	Amino Acid Degradation	L-tyrosine degradation	0.753892	8.70148	2.8417	0.00589073	0.0337504	-2.46623
5	TYRFUMCAT-PWY	Amino Acid Degradation	Amino Acid Degradation	L-tyrosine degradation	0.702973	8.70148	2.63627	0.0103395	0.0762931	-3.04982
28	TYRFUMCAT-PWY	Amino Acid Degradation	Amino Acid Degradation	L-tyrosine degradation	-0.423057	8.70148	-1.45092	0.151319	0.44127	-4.7318
2	PWY-5651	Amino Acid Degradation	Amino Acid Degradation	L-tryptophan degradation	-1.22621	2.81916	-3.7685	0.000341834	0.00667506	0.00497584
5	PWY-5651	Amino Acid Degradation	Amino Acid Degradation	L-tryptophan degradation	-0.45561	2.81916	-1.4072	0.163843	0.359422	-4.47292
28	PWY-5651	Amino Acid Degradation	Amino Acid Degradation	L-tryptophan degradation	-0.317328	2.81916	-0.981771	0.329632	0.581634	-4.89359
2	PWY-5655	Amino Acid Degradation	Amino Acid Degradation	L-tryptophan degradation IX	-1.07205	2.95256	-3.5237	0.000758898	0.011922	-0.63502
5	PWY-5655	Amino Acid Degradation	Amino Acid Degradation	L-tryptophan degradation IX	-0.446586	2.95256	-1.47615	0.14444	0.337999	-4.44096
28	PWY-5655	Amino Acid Degradation	Amino Acid Degradation	L-tryptophan degradation IX	-0.261417	2.95256	-0.866229	0.389357	0.622236	-4.97481
2	PWY-6505	Amino Acid Degradation	Amino Acid Degradation	L-tryptophan degradation XII	-0.983041	2.83261	-3.30804	0.00149289	0.0176934	-1.17796
5	PWY-6505	Amino Acid Degradation	Amino Acid Degradation	L-tryptophan degradation XII	-0.469909	2.83261	-1.58757	0.116942	0.30455	-4.3875
28	PWY-6505	Amino Acid Degradation	Amino Acid Degradation	L-tryptophan degradation XII	-0.25702	2.83261	-0.870848	0.386848	0.621765	-4.97189
2	3-HYDROXYPHENYLACETATE-DEGRADATION-PWY	Aromatic Compound Degradation	Aromatic Compound Degradation	Aromatic Compound Degradation	-0.690274	3.86005	-2.63066	0.0104956	0.0444467	-2.7256
5	3-HYDROXYPHENYLACETATE-DEGRADATION-PWY	Aromatic Compound Degradation	Aromatic Compound Degradation	Aromatic Compound Degradation	-0.403597	3.86005	-1.54703	0.126418	0.320653	-4.40131
28	3-HYDROXYPHENYLACETATE-DEGRADATION-PWY	Aromatic Compound Degradation	Aromatic Compound Degradation	Aromatic Compound Degradation	-0.199594	3.86005	-0.768466	0.444825	0.672763	-5.05371
2	PWY-5180	Aromatic Compound Degradation	Aromatic Compound Degradation	Aromatic Compound Degradation	-0.93852	7.2593	-4.72645	1.16223e-05	0.00116032	3.09165
5	PWY-5180	Aromatic Compound Degradation	Aromatic Compound Degradation	Toluene degradation	-0.622338	7.2593	-3.20467	0.00204608	0.0433316	-2.65513
28	PWY-5180	Aromatic Compound Degradation	Aromatic Compound Degradation	Toluene degradation	0.235729	7.2593	1.28376	0.203507	0.44691	-4.85288
2	PWY-5182	Aromatic Compound Degradation	Aromatic Compound Degradation	Toluene degradation	-0.93852	7.2593	-4.72645	1.16223e-05	0.00116032	3.09165
5	PWY-5182	Aromatic Compound Degradation	Aromatic Compound Degradation	Toluene degradation	-0.622338	7.2593	-3.20467	0.00204608	0.0433316	-2.65513
28	PWY-5182	Aromatic Compound Degradation	Aromatic Compound Degradation	Toluene degradation	0.235729	7.2593	1.28376	0.203507	0.44691	-4.85288
2	COLANSYN-PWY	Carbohydrate Biosynthesis	Carbohydrate Biosynthesis	Carbohydrate Biosynthesis	-0.244889	11.5574	-2.80019	0.00661423	0.0360081	-3.19671
5	COLANSYN-PWY	Carbohydrate Biosynthesis	Carbohydrate Biosynthesis	Carbohydrate Biosynthesis	-0.145591	11.5574	-1.84149	0.0698353	0.229074	-4.24963
28	COLANSYN-PWY	Carbohydrate Biosynthesis	Carbohydrate Biosynthesis	Carbohydrate Biosynthesis	0.0538789	11.5574	0.702447	0.484756	0.70979	-6.3635
2	PWY-7031	Carbohydrate Biosynthesis	Glycan Biosynthesis	Protein Glycosylation	-0.634502	6.70906	-2.82879	0.00610752	0.0345856	-2.33299
5	PWY-7031	Carbohydrate Biosynthesis	Glycan Biosynthesis	Protein Glycosylation	-0.561027	6.70906	-2.51794	0.0141216	0.0893143	-3.54934
28	PWY-7031	Carbohydrate Biosynthesis	Glycan Biosynthesis	Protein Glycosylation	0.32535	6.70906	1.53413	0.129556	0.417838	-4.51313
2	GLYCOGENSYNTH-PWY	Carbohydrate Biosynthesis	Polysaccharide Biosynthesis	Glycan Biosynhtesis (Glycogen and Starch Biosynthesis)	-0.19904	12.1592	-3.77226	0.000337593	0.00667506	-0.782914
5	GLYCOGENSYNTH-PWY	Carbohydrate Biosynthesis	Polysaccharide Biosynthesis	Glycan Biosynhtesis (Glycogen and Starch Biosynthesis)	-0.127795	12.1592	-2.58627	0.0118085	0.0809961	-3.02404
28	GLYCOGENSYNTH-PWY	Carbohydrate Biosynthesis	Polysaccharide Biosynthesis	Glycan Biosynhtesis (Glycogen and Starch Biosynthesis)	0.0706944	12.1592	1.52537	0.131723	0.419862	-5.84249
2	PWY-6749	Carbohydrate Biosynthesis	Sugar Nucleotide Biosynthesis	CMP-sugar Biosynthesis	-0.369692	8.723	-2.6824	0.00913382	0.0424153	-2.80646
5	PWY-6749	Carbohydrate Biosynthesis	Sugar Nucleotide Biosynthesis	CMP-sugar Biosynthesis	-0.373263	8.723	-2.71392	0.00838524	0.0716423	-3.00472
28	PWY-6749	Carbohydrate Biosynthesis	Sugar Nucleotide Biosynthesis	CMP-sugar Biosynthesis	0.178066	8.723	1.35092	0.18112	0.44691	-4.90358
2	PWY-7323	Carbohydrate Biosynthesis	Sugar Nucleotide Biosynthesis	GDP-sugar Biosynthesis	-0.272346	11.4366	-2.76858	0.00721897	0.0368351	-3.2041
5	PWY-7323	Carbohydrate Biosynthesis	Sugar Nucleotide Biosynthesis	GDP-sugar Biosynthesis	-0.148888	11.4366	-1.68596	0.0963068	0.274277	-4.44363
28	PWY-7323	Carbohydrate Biosynthesis	Sugar Nucleotide Biosynthesis	GDP-sugar Biosynthesis	0.0526727	11.4366	0.616618	0.53951	0.742207	-6.35223
2	PWY-7332	Carbohydrate Biosynthesis	Sugar Nucleotide Biosynthesis	UDP-sugar Biosynthesis	-0.536424	8.63394	-2.67844	0.00923208	0.0424153	-2.80412
5	PWY-7332	Carbohydrate Biosynthesis	Sugar Nucleotide Biosynthesis	UDP-sugar Biosynthesis	-0.256132	8.63394	-1.31241	0.193717	0.394728	-4.53295
28	PWY-7332	Carbohydrate Biosynthesis	Sugar Nucleotide Biosynthesis	UDP-sugar Biosynthesis	0.0644274	8.63394	0.339068	0.735585	0.861129	-5.6578
2	GLYCOCAT-PWY	Carbohydrate Degradation	Polysaccharide Degradation	Glycan Degradation	-0.235618	12.0282	-3.35797	0.00127927	0.0159745	-1.99076
5	GLYCOCAT-PWY	Carbohydrate Degradation	Polysaccharide Degradation	Glycan Degradation	-0.118144	12.0282	-1.8398	0.0700864	0.229074	-4.47881
28	GLYCOCAT-PWY	Carbohydrate Degradation	Polysaccharide Degradation	Glycan Degradation	0.126792	12.0282	2.12153	0.0374597	0.19616	-4.77836
2	KETOGLUCONMET-PWY	Carboxylate Degradation	Sugar Acid Degradation	Sugar Acid Degradation	-0.926335	4.60049	-2.79284	0.00675047	0.0361262	-2.38165
5	KETOGLUCONMET-PWY	Carboxylate Degradation	Sugar Acid Degradation	Sugar Acid Degradation	-0.914238	4.60049	-2.7498	0.00760173	0.0701185	-3.53388
28	KETOGLUCONMET-PWY	Carboxylate Degradation	Sugar Acid Degradation	Sugar Acid Degradation	-0.29556	4.60049	-0.905939	0.368111	0.609763	-5.01016
2	PWY-6612	Cofactor, Carrier, and Vitamin Biosynthesis	Carrier Biosynthesis	Folate Biosynthesis	0.0357757	12.6475	1.70266	0.09312	0.204277	-6.36479
5	PWY-6612	Cofactor, Carrier, and Vitamin Biosynthesis	Carrier Biosynthesis	Folate Biosynthesis	0.0212001	12.6475	1.04098	0.301509	0.539834	-5.99875
28	PWY-6612	Cofactor, Carrier, and Vitamin Biosynthesis	Carrier Biosynthesis	Folate Biosynthesis	-0.0562514	12.6475	-2.61652	0.0108988	0.0965042	-4.03083
2	PWY-7373	Cofactor, Carrier, and Vitamin Biosynthesis	Electron Carrier Biosynthesis	Demethylmenaquinol Biosynthesis	-0.657562	6.48841	-2.95506	0.00427009	0.0266674	-2.02725
5	PWY-7373	Cofactor, Carrier, and Vitamin Biosynthesis	Electron Carrier Biosynthesis	Demethylmenaquinol Biosynthesis	-0.525359	6.48841	-2.38302	0.0199213	0.106612	-3.70208
28	PWY-7373	Cofactor, Carrier, and Vitamin Biosynthesis	Electron Carrier Biosynthesis	Demethylmenaquinol Biosynthesis	0.360995	6.48841	1.71866	0.0901472	0.346792	-4.26096
2	PWY-6263	Cofactor, Carrier, and Vitamin Biosynthesis	Electron Carrier Biosynthesis	Menaquinol Biosynthesis	-0.624315	7.99715	-2.96841	0.00410909	0.0266674	-2.05819
5	PWY-6263	Cofactor, Carrier, and Vitamin Biosynthesis	Electron Carrier Biosynthesis	Menaquinol Biosynthesis	-0.498385	7.99715	-2.39889	0.0191428	0.105938	-3.50745
28	PWY-6263	Cofactor, Carrier, and Vitamin Biosynthesis	Electron Carrier Biosynthesis	Menaquinol Biosynthesis	0.334383	7.99715	1.71194	0.0913851	0.346792	-4.37213
2	PWY-7371	Cofactor, Carrier, and Vitamin Biosynthesis	Electron Carrier Biosynthesis	Quinol and Quinone Biosynthesis	-0.675661	6.56733	-3.04655	0.00327471	0.0234527	-1.80641
5	PWY-7371	Cofactor, Carrier, and Vitamin Biosynthesis	Electron Carrier Biosynthesis	Quinol and Quinone Biosynthesis	-0.518234	6.56733	-2.36189	0.0210006	0.109971	-3.71265
28	PWY-7371	Cofactor, Carrier, and Vitamin Biosynthesis	Electron Carrier Biosynthesis	Quinol and Quinone Biosynthesis	0.361903	6.56733	1.73268	0.0876069	0.346792	-4.24599
2	PWY1G-0	Cofactor, Carrier, and Vitamin Biosynthesis	Electron Carrier Biosynthesis	Mycothiol biosynthesis	0.461337	8.76348	2.9387	0.00447518	0.0274979	-2.19503
5	PWY1G-0	Cofactor, Carrier, and Vitamin Biosynthesis	Electron Carrier Biosynthesis	Mycothiol biosynthesis	0.31919	8.76348	2.01153	0.0481644	0.169972	-3.88179
28	PWY1G-0	Cofactor, Carrier, and Vitamin Biosynthesis	Electron Carrier Biosynthesis	Mycothiol biosynthesis	0.272234	8.76348	1.7034	0.0929792	0.346792	-4.40451
2	PWY-5857	Cofactor, Carrier, and Vitamin Biosynthesis	Electron Carrier Biosynthesis	Ubiquinol-10 Biosynthesis	0.473924	10.4478	2.75529	0.00748805	0.0368351	-3.02204
5	PWY-5857	Cofactor, Carrier, and Vitamin Biosynthesis	Electron Carrier Biosynthesis	Ubiquinol-10 Biosynthesis	0.463925	10.4478	2.64765	0.0100294	0.0751432	-2.72355
28	PWY-5857	Cofactor, Carrier, and Vitamin Biosynthesis	Electron Carrier Biosynthesis	Ubiquinol-10 Biosynthesis	-0.308381	10.4478	-1.51094	0.135356	0.419862	-4.93372
2	PWY-5855	Cofactor, Carrier, and Vitamin Biosynthesis	Electron Carrier Biosynthesis	Ubiquinol-07 Biosynthesis	0.473924	10.4478	2.75529	0.00748805	0.0368351	-3.02204
5	PWY-5855	Cofactor, Carrier, and Vitamin Biosynthesis	Electron Carrier Biosynthesis	Ubiquinol-07 Biosynthesis	0.463925	10.4478	2.64765	0.0100294	0.0751432	-2.72355
28	PWY-5855	Cofactor, Carrier, and Vitamin Biosynthesis	Electron Carrier Biosynthesis	Ubiquinol-07 Biosynthesis	-0.308381	10.4478	-1.51094	0.135356	0.419862	-4.93372
2	PWY-6708	Cofactor, Carrier, and Vitamin Biosynthesis	Electron Carrier Biosynthesis	Ubiquinol-08 Biosynthesis	0.473924	10.4478	2.75529	0.00748805	0.0368351	-3.02204
5	PWY-6708	Cofactor, Carrier, and Vitamin Biosynthesis	Electron Carrier Biosynthesis	Ubiquinol-08 Biosynthesis	0.463925	10.4478	2.64765	0.0100294	0.0751432	-2.72355
28	PWY-6708	Cofactor, Carrier, and Vitamin Biosynthesis	Electron Carrier Biosynthesis	Ubiquinol-08 Biosynthesis	-0.308381	10.4478	-1.51094	0.135356	0.419862	-4.93372
2	UBISYN-PWY	Cofactor, Carrier, and Vitamin Biosynthesis	Electron Carrier Biosynthesis	Ubiquinol-08 Biosynthesis	0.465896	10.4237	2.6346	0.0103858	0.0444467	-3.28996
5	UBISYN-PWY	Cofactor, Carrier, and Vitamin Biosynthesis	Electron Carrier Biosynthesis	Ubiquinol-08 Biosynthesis	0.458679	10.4237	2.54446	0.0131791	0.0855761	-2.92464
28	UBISYN-PWY	Cofactor, Carrier, and Vitamin Biosynthesis	Electron Carrier Biosynthesis	Ubiquinol-08 Biosynthesis	-0.290376	10.4237	-1.40201	0.165381	0.44691	-5.0671
2	PWY-5856	Cofactor, Carrier, and Vitamin Biosynthesis	Electron Carrier Biosynthesis	Ubiquinol-09 Biosynthesis	0.473924	10.4478	2.75529	0.00748805	0.0368351	-3.02204
5	PWY-5856	Cofactor, Carrier, and Vitamin Biosynthesis	Electron Carrier Biosynthesis	Ubiquinol-09 Biosynthesis	0.463925	10.4478	2.64765	0.0100294	0.0751432	-2.72355
28	PWY-5856	Cofactor, Carrier, and Vitamin Biosynthesis	Electron Carrier Biosynthesis	Ubiquinol-09 Biosynthesis	-0.308381	10.4478	-1.51094	0.135356	0.419862	-4.93372
2	COBALSYN-PWY	Cofactor, Carrier, and Vitamin Biosynthesis	Enzyme Cofactor Biosynthesis	Superpathway of adenosylcobalamin salvage from cobinamide I	-0.514589	11.131	-4.67062	1.42956e-05	0.00116032	2.76243
5	COBALSYN-PWY	Cofactor, Carrier, and Vitamin Biosynthesis	Enzyme Cofactor Biosynthesis	Superpathway of adenosylcobalamin salvage from cobinamide I	-0.380305	11.131	-3.63298	0.000533561	0.0259844	-0.442628
28	COBALSYN-PWY	Cofactor, Carrier, and Vitamin Biosynthesis	Enzyme Cofactor Biosynthesis	Superpathway of adenosylcobalamin salvage from cobinamide I	0.0852491	11.131	0.91454	0.363608	0.609763	-5.9968
2	PWY-6269	Cofactor, Carrier, and Vitamin Biosynthesis	Enzyme Cofactor Biosynthesis	Superpathway of adenosylcobalamin salvage from cobinamide II	-0.519925	11.0981	-4.71939	1.19314e-05	0.00116032	2.94581
5	PWY-6269	Cofactor, Carrier, and Vitamin Biosynthesis	Enzyme Cofactor Biosynthesis	Superpathway of adenosylcobalamin salvage from cobinamide II	-0.385059	11.0981	-3.67667	0.000462685	0.0259844	-0.34905
28	PWY-6269	Cofactor, Carrier, and Vitamin Biosynthesis	Enzyme Cofactor Biosynthesis	Superpathway of adenosylcobalamin salvage from cobinamide II	0.0767439	11.0981	0.820286	0.414869	0.647568	-6.05713
2	PWY-5507	Cofactor, Carrier, and Vitamin Biosynthesis	Enzyme Cofactor Biosynthesis	Adenosylcobalamin biosynthesis I (anaerobic)	-0.849919	7.12359	-2.84421	0.00584944	0.0337504	-2.3343
5	PWY-5507	Cofactor, Carrier, and Vitamin Biosynthesis	Enzyme Cofactor Biosynthesis	Adenosylcobalamin biosynthesis I (anaerobic)	-0.522406	7.12359	-1.77932	0.0795781	0.254964	-4.16253
28	PWY-5507	Cofactor, Carrier, and Vitamin Biosynthesis	Enzyme Cofactor Biosynthesis	Adenosylcobalamin biosynthesis I (anaerobic)	-0.278991	7.12359	-0.970293	0.335279	0.585147	-5.15622
2	P381-PWY	Cofactor, Carrier, and Vitamin Biosynthesis	Enzyme Cofactor Biosynthesis	Adenosylcobalamin biosynthesis II (aerobic)	-0.992744	6.05811	-2.57943	0.0120235	0.0487952	-2.86911
5	P381-PWY	Cofactor, Carrier, and Vitamin Biosynthesis	Enzyme Cofactor Biosynthesis	Adenosylcobalamin biosynthesis II (aerobic)	-0.109154	6.05811	-0.297106	0.767275	0.864961	-4.85856
28	P381-PWY	Cofactor, Carrier, and Vitamin Biosynthesis	Enzyme Cofactor Biosynthesis	Adenosylcobalamin biosynthesis II (aerobic)	0.327426	6.05811	0.907755	0.367157	0.609763	-5.09866
2	PWY-5509	Cofactor, Carrier, and Vitamin Biosynthesis	Enzyme Cofactor Biosynthesis	Adenosylcobalamin biosynthesis from adenosylcobinamide-GDP I	-0.520049	11.096	-4.72623	1.16319e-05	0.00116032	2.9703
5	PWY-5509	Cofactor, Carrier, and Vitamin Biosynthesis	Enzyme Cofactor Biosynthesis	Adenosylcobalamin biosynthesis from adenosylcobinamide-GDP I	-0.385457	11.096	-3.685	0.000450223	0.0259844	-0.328346
28	PWY-5509	Cofactor, Carrier, and Vitamin Biosynthesis	Enzyme Cofactor Biosynthesis	Adenosylcobalamin biosynthesis from adenosylcobinamide-GDP I	0.0734387	11.096	0.785269	0.434976	0.668818	-6.08348
2	PWY-7377	Cofactor, Carrier, and Vitamin Biosynthesis	Enzyme Cofactor Biosynthesis	cob(II)yrinate a,c-diamide biosynthesis	-0.493606	10.8321	-4.38152	4.10075e-05	0.00249633	1.84491
5	PWY-7377	Cofactor, Carrier, and Vitamin Biosynthesis	Enzyme Cofactor Biosynthesis	cob(II)yrinate a,c-diamide biosynthesis	-0.400016	10.8321	-3.64634	0.000510869	0.0259844	-0.587565
28	PWY-7377	Cofactor, Carrier, and Vitamin Biosynthesis	Enzyme Cofactor Biosynthesis	cob(II)yrinate a,c-diamide biosynthesis	0.0157873	10.8321	0.156244	0.876296	0.925718	-6.2104
2	HEMESYN2-PWY	Cofactor, Carrier, and Vitamin Biosynthesis	Enzyme Cofactor Biosynthesis	Heme Biosynthesis	0.184158	12.3488	4.32992	4.93271e-05	0.00266914	0.854618
5	HEMESYN2-PWY	Cofactor, Carrier, and Vitamin Biosynthesis	Enzyme Cofactor Biosynthesis	Heme Biosynthesis	0.127239	12.3488	2.99523	0.0038027	0.053101	-2.13144
28	HEMESYN2-PWY	Cofactor, Carrier, and Vitamin Biosynthesis	Enzyme Cofactor Biosynthesis	Heme Biosynthesis	0.00325576	12.3488	0.0731377	0.941907	0.96774	-7.03433
2	PWY-6285	Fatty Acid and Lipid Biosynthesis	Fatty Acid Biosynthesis	Fatty Acid Biosynthesis	-2.14673	-1.46343	-3.08972	0.00288436	0.0233817	-1.69377
5	PWY-6285	Fatty Acid and Lipid Biosynthesis	Fatty Acid Biosynthesis	Fatty Acid Biosynthesis	-1.17583	-1.46343	-1.68841	0.0958336	0.274277	-4.3188
28	PWY-6285	Fatty Acid and Lipid Biosynthesis	Fatty Acid Biosynthesis	Fatty Acid Biosynthesis	-0.794021	-1.46343	-1.13542	0.260116	0.500241	-4.80449
2	PWY-6284	Fatty Acid and Lipid Biosynthesis	Fatty Acid Biosynthesis	Unsaturated Fatty Acid Biosynthesis	-1.93969	-1.90414	-3.16201	0.00232623	0.0209792	-1.51981
5	PWY-6284	Fatty Acid and Lipid Biosynthesis	Fatty Acid Biosynthesis	Unsaturated Fatty Acid Biosynthesis	-1.08491	-1.90414	-1.76155	0.0825613	0.259402	-4.27852
28	PWY-6284	Fatty Acid and Lipid Biosynthesis	Fatty Acid Biosynthesis	Unsaturated Fatty Acid Biosynthesis	-0.752566	-1.90414	-1.21662	0.22788	0.460488	-4.73082
2	PWY4FS-7	Fatty Acid and Lipid Biosynthesis	Lipid Biosynthesis	Phosphatidylglycerol Biosynthesis	0.0890598	12.9157	3.79154	0.000316627	0.00667506	-1.43247
5	PWY4FS-7	Fatty Acid and Lipid Biosynthesis	Lipid Biosynthesis	Phosphatidylglycerol Biosynthesis	0.0768118	12.9157	3.30916	0.00148774	0.0402515	-1.6745
28	PWY4FS-7	Fatty Acid and Lipid Biosynthesis	Lipid Biosynthesis	Phosphatidylglycerol Biosynthesis	-0.0451222	12.9157	-1.86602	0.0662758	0.290777	-5.84993
2	PWY4FS-8	Fatty Acid and Lipid Biosynthesis	Lipid Biosynthesis	Phosphatidylglycerol Biosynthesis	0.0890598	12.9157	3.79154	0.000316627	0.00667506	-1.43247
5	PWY4FS-8	Fatty Acid and Lipid Biosynthesis	Lipid Biosynthesis	Phosphatidylglycerol Biosynthesis	0.0768118	12.9157	3.30916	0.00148774	0.0402515	-1.6745
28	PWY4FS-8	Fatty Acid and Lipid Biosynthesis	Lipid Biosynthesis	Phosphatidylglycerol Biosynthesis	-0.0451222	12.9157	-1.86602	0.0662758	0.290777	-5.84993
2	PHOSLIPSYN-PWY	Fatty Acid and Lipid Biosynthesis	Lipid Biosynthesis	Phospholipid Biosynthesis	0.0924154	12.9802	3.83666	0.000272315	0.00667506	-1.33618
5	PHOSLIPSYN-PWY	Fatty Acid and Lipid Biosynthesis	Lipid Biosynthesis	Phospholipid Biosynthesis	0.0762944	12.9802	3.20461	0.00204646	0.0433316	-2.01093
28	PHOSLIPSYN-PWY	Fatty Acid and Lipid Biosynthesis	Lipid Biosynthesis	Phospholipid Biosynthesis	-0.0551938	12.9802	-2.2251	0.029336	0.162348	-5.19701
2	PWY-4984	Inorganic nutrient metabolism	Nitrogen Compound Metabolism	Urea cycle	-0.324527	10.0121	-2.9311	0.00457357	0.0274979	-2.36027
5	PWY-4984	Inorganic nutrient metabolism	Nitrogen Compound Metabolism	Urea cycle	-0.340903	10.0121	-3.09169	0.00286757	0.0504368	-2.09058
28	PWY-4984	Inorganic nutrient metabolism	Nitrogen Compound Metabolism	Urea cycle	0.104886	10.0121	0.983938	0.328573	0.581634	-5.48326
2	PPGPPMET-PWY	Metabolic Regulator Biosynthesis	Metabolic Regulator Biosynthesis	ppGpp biosynthesis	0.223391	11.7568	2.66808	0.0094936	0.0429098	-3.8675
5	PPGPPMET-PWY	Metabolic Regulator Biosynthesis	Metabolic Regulator Biosynthesis	ppGpp biosynthesis	0.165204	11.7568	1.92994	0.0577131	0.196547	-4.26146
28	PPGPPMET-PWY	Metabolic Regulator Biosynthesis	Metabolic Regulator Biosynthesis	ppGpp biosynthesis	-0.298076	11.7568	-2.80491	0.00652793	0.0808111	-2.89476
2	PWY0-1479	Nucleic Acid Processing	Nucleic Acid Processing		0.273833	11.6642	3.85081	0.000259693	0.00667506	-0.343559
5	PWY0-1479	Nucleic Acid Processing	Nucleic Acid Processing		0.210975	11.6642	2.91863	0.00473927	0.0540719	-2.11705
28	PWY0-1479	Nucleic Acid Processing	Nucleic Acid Processing		-0.206201	11.6642	-2.46061	0.016369	0.118981	-3.62329
2	P164-PWY	Nucleoside and Nucleotide Biosynthesis	Purine Nucleotide Degradation	Purine Nucleotide Degradation	-0.305965	10.2089	-2.8455	0.00582832	0.0337504	-2.59679
5	P164-PWY	Nucleoside and Nucleotide Biosynthesis	Purine Nucleotide Degradation	Purine Nucleotide Degradation	-0.296678	10.2089	-2.7757	0.00707844	0.0701185	-2.62583
28	P164-PWY	Nucleoside and Nucleotide Biosynthesis	Purine Nucleotide Degradation	Purine Nucleotide Degradation	0.23352	10.2089	2.29287	0.0248986	0.145141	-3.57574
2	PWY-6545	Nucleoside and Nucleotide Biosynthesis	Pyrimidine Nucelotide Biosynthesis	Pyrimidine Deoxyribonucleotide De Novo Biosynthesis	-0.533349	9.69676	-3.5113	0.000789527	0.0120156	-0.726531
5	PWY-6545	Nucleoside and Nucleotide Biosynthesis	Pyrimidine Nucelotide Biosynthesis	Pyrimidine Deoxyribonucleotide De Novo Biosynthesis	-0.303162	9.69676	-2.05771	0.0433868	0.162533	-3.76425
28	PWY-6545	Nucleoside and Nucleotide Biosynthesis	Pyrimidine Nucelotide Biosynthesis	Pyrimidine Deoxyribonucleotide De Novo Biosynthesis	0.276692	9.69676	1.98507	0.0511011	0.243983	-4.10885
2	P108-PWY	Precursor Metabolites and Energy	Fermentation	Pyruvate fermentation to propanoate I	-0.291041	11.1971	-3.04759	0.00326483	0.0234527	-2.37488
5	P108-PWY	Precursor Metabolites and Energy	Fermentation	Pyruvate fermentation to propanoate I	-0.322377	11.1971	-3.39979	0.0011229	0.0390609	-1.01934
28	P108-PWY	Precursor Metabolites and Energy	Fermentation	Pyruvate fermentation to propanoate I	-0.0165621	11.1971	-0.186561	0.852551	0.915873	-6.33961
2	GLYCOLYSIS-E-D	Precursor Metabolites and Energy	Glycolysis	Superpathway of glycolysis and the Entner-Doudoroff pathway	0.124105	12.0704	3.56622	0.000662164	0.0113956	-1.39471
5	GLYCOLYSIS-E-D	Precursor Metabolites and Energy	Glycolysis	Superpathway of glycolysis and the Entner-Doudoroff pathway	0.114672	12.0704	3.35836	0.00127773	0.0402515	-1.05048
28	GLYCOLYSIS-E-D	Precursor Metabolites and Energy	Glycolysis	Superpathway of glycolysis and the Entner-Doudoroff pathway	-0.00635096	12.0704	-0.177566	0.859583	0.915873	-6.79387
2	PENTOSE-P-PWY	Precursor Metabolites and Energy	Pentose Phosphate Pathways	Pentose Phosphate Pathways	0.187547	12.1837	4.02191	0.000145181	0.00471355	-0.0506561
5	PENTOSE-P-PWY	Precursor Metabolites and Energy	Pentose Phosphate Pathways	Pentose Phosphate Pathways	0.139137	12.1837	2.9877	0.00388655	0.053101	-2.06775
28	PENTOSE-P-PWY	Precursor Metabolites and Energy	Pentose Phosphate Pathways	Pentose Phosphate Pathways	-0.0338568	12.1837	-0.686359	0.49478	0.710789	-6.65105
2	METH-ACETATE-PWY	Precursor Metabolites and Energy	Respiration	Anaerobic Respiration	-0.699345	6.75599	-2.76928	0.00720491	0.0368351	-2.47809
5	METH-ACETATE-PWY	Precursor Metabolites and Energy	Respiration	Anaerobic Respiration	-0.614672	6.75599	-2.45628	0.016551	0.0971124	-3.58629
28	METH-ACETATE-PWY	Precursor Metabolites and Energy	Respiration	Anaerobic Respiration	-0.269872	6.75599	-1.09452	0.277522	0.517828	-4.97959
2	FERMENTATION-PWY	Precursor Metabolites and Energy	Fermentation	Mixed acid fermentation	0.111734	12.2442	3.40173	0.00111612	0.01553	-2.03463
5	FERMENTATION-PWY	Precursor Metabolites and Energy	Fermentation	Mixed acid fermentation	0.106884	12.2442	3.34081	0.00134923	0.0402515	-1.16723
28	FERMENTATION-PWY	Precursor Metabolites and Energy	Fermentation	Mixed acid fermentation	-0.0971391	12.2442	-2.79002	0.0068034	0.0808111	-3.22835
2	PWY-6588	Precursor Metabolites and Energy	Fermentation	Pyruvate fermentation to acetone	-0.423232	10.7841	-4.02633	0.000142989	0.00471355	0.657942
5	PWY-6588	Precursor Metabolites and Energy	Fermentation	Pyruvate fermentation to acetone	-0.3129	10.7841	-3.08359	0.002937	0.0504368	-1.83284
28	PWY-6588	Precursor Metabolites and Energy	Fermentation	Pyruvate fermentation to acetone	-0.159463	10.7841	-1.60559	0.112918	0.390008	-4.95754
2	PWY-5676	Precursor Metabolites and Energy	Fermentation	Acetyl-CoA fermentation to Short-Chain Fatty Acids	-0.662386	9.98313	-4.5801	1.99506e-05	0.00138799	2.63149
5	PWY-5676	Precursor Metabolites and Energy	Fermentation	Acetyl-CoA fermentation to Short-Chain Fatty Acids	-0.425097	9.98313	-3.03104	0.00342662	0.0505685	-2.16544
28	PWY-5676	Precursor Metabolites and Energy	Fermentation	Acetyl-CoA fermentation to Short-Chain Fatty Acids	-0.238937	9.98313	-1.72167	0.0895959	0.346792	-4.57338
2	PWY-5100	Precursor Metabolites and Energy	Fermentation	Pyruvate fermentation to acetate and lactate II	-0.168933	12.4718	-2.81138	0.00641163	0.0354825	-3.83201
5	PWY-5100	Precursor Metabolites and Energy	Fermentation	Pyruvate fermentation to acetate and lactate II	-0.162073	12.4718	-2.85557	0.0056658	0.0613166	-2.58467
28	PWY-5100	Precursor Metabolites and Energy	Fermentation	Pyruvate fermentation to acetate and lactate II	0.0391728	12.4718	0.716596	0.476035	0.704647	-7.0025
2	P341-PWY	Precursor Metabolites and Energy	Glycolysis	Glycolysis V (Pyrococcus)	-1.01659	5.01347	-3.19976	0.00207662	0.0205289	-1.4222
5	P341-PWY	Precursor Metabolites and Energy	Glycolysis	Glycolysis V (Pyrococcus)	-0.589718	5.01347	-1.8851	0.063615	0.210752	-4.17897
28	P341-PWY	Precursor Metabolites and Energy	Glycolysis	Glycolysis V (Pyrococcus)	-0.0994339	5.01347	-0.324601	0.746462	0.871767	-5.30683
2	NONOXIPENT-PWY	Precursor Metabolites and Energy	Pentose Phosphate Pathways	Pentose Phosphate Pathways (non-oxidative branch)	-0.0932093	12.9977	-3.21773	0.00196689	0.0205289	-3.21795
5	NONOXIPENT-PWY	Precursor Metabolites and Energy	Pentose Phosphate Pathways	Pentose Phosphate Pathways (non-oxidative branch)	-0.0574536	12.9977	-2.04037	0.0451306	0.165962	-4.8036
28	NONOXIPENT-PWY	Precursor Metabolites and Energy	Pentose Phosphate Pathways	Pentose Phosphate Pathways (non-oxidative branch)	0.020274	12.9977	0.718319	0.474979	0.704647	-7.41999
2	PWY-5913	Precursor Metabolites and Energy	TCA cycle	partial TCA cycle (obligate autotrophs)	0.14449	11.871	3.03291	0.00340802	0.0240537	-2.80425
5	PWY-5913	Precursor Metabolites and Energy	TCA cycle	partial TCA cycle (obligate autotrophs)	-0.589718	5.01347	-1.8851	0.063615	0.210752	-4.17897
28	PWY-5913	Precursor Metabolites and Energy	TCA cycle	partial TCA cycle (obligate autotrophs)	-0.0994339	5.01347	-0.324601	0.746462	0.871767	-5.30683
2	TCA	Precursor Metabolites and Energy	TCA cycle	TCA cycle I (prokaryotic)	0.167174	11.8345	3.06058	0.00314274	0.0234527	-2.73388
5	TCA	Precursor Metabolites and Energy	TCA cycle	TCA cycle I (prokaryotic)	0.202074	11.8345	3.80772	0.0003	0.0259844	0.240836
28	TCA	Precursor Metabolites and Energy	TCA cycle	TCA cycle I (prokaryotic)	-0.0721423	11.8345	-1.2496	0.215655	0.44691	-5.88753
2	PWY-6969	Precursor Metabolites and Energy	TCA cycle	TCA cycle V (2-oxoglutarate synthase)	0.140121	11.9303	2.798	0.00665447	0.0360081	-3.48155
5	PWY-6969	Precursor Metabolites and Energy	TCA cycle	TCA cycle V (2-oxoglutarate synthase)	0.179814	11.9303	3.73178	0.000386011	0.0259844	0.0160144
28	PWY-6969	Precursor Metabolites and Energy	TCA cycle	TCA cycle V (2-oxoglutarate synthase)	-0.0627019	11.9303	-1.19846	0.234827	0.470621	-6.01883
2	REDCITCYC	Precursor Metabolites and Energy	TCA cycle	TCA cycle VI (Helicobacter)	0.321158	11.2416	3.14822	0.00242422	0.0213695	-2.15923
5	REDCITCYC	Precursor Metabolites and Energy	TCA cycle	TCA cycle VI (Helicobacter)	0.307819	11.2416	3.04102	0.00332814	0.0505685	-1.83034
28	REDCITCYC	Precursor Metabolites and Energy	TCA cycle	TCA cycle VI (Helicobacter)	-0.101096	11.2416	-0.926464	0.357424	0.604395	-5.86808
2	PWY-7254	Precursor Metabolites and Energy	TCA cycle	TCA cycle VII (acetate-producers)	0.224098	11.1695	2.7795	0.00700444	0.0368351	-3.08305
5	PWY-7254	Precursor Metabolites and Energy	TCA cycle	TCA cycle VII (acetate-producers)	0.207625	11.1695	2.58839	0.0117425	0.0809961	-2.80684
28	PWY-7254	Precursor Metabolites and Energy	TCA cycle	TCA cycle VII (acetate-producers)	-0.0939076	11.1695	-1.1043	0.273287	0.515856	-5.65898
